# Supplementary material
Source: PubMed Central journal article supplement (PMC2176127)

# **Pulmonary Exposure to Particles during Pregnancy Causes Increased Neonatal Asthma Susceptibility**

Alexey V. Fedulov<sup>1</sup>, Adriana Leme<sup>1</sup>, Zhiping Yang<sup>1</sup>, Morten Dahl<sup>1</sup>, Robert Lim<sup>1</sup>,  
Thomas J. Mariani<sup>2</sup>, and Lester Kobzik<sup>1</sup>

<sup>1</sup>Molecular and Integrative Physiological Sciences Program, Department of Environmental Health, Harvard School of Public Health; and <sup>2</sup>Lung Biology Center, Brigham and Women's Hospital, Harvard Medical School, Boston, Massachusetts

**Online Data Supplement A**

## **Figure Legends.**

**Figure EA.** Significance Analysis for Microarrays (SAM). SAM was performed across all 16 samples in order to identify genes significantly different in groups Norm PBS, Norm TiO<sub>2</sub>, Preg PBS and Preg TiO<sub>2</sub>.

**Figure EB.** Hierarchical clustering post ANOVA.

Left: Hierarchical clustering was performed for genes significantly different in the group Preg TiO<sub>2</sub> vs Preg PBS, with subtraction of genes significantly different in Norm TiO<sub>2</sub> vs Norm PBS and of genes significantly different in all Preg vs all Norm. Right: Similarly hierarchical clustering was performed for genes significantly different in the group Norm TiO<sub>2</sub> vs Norm PBS with exclusion of those genes significantly different in Preg TiO<sub>2</sub> vs Preg PBS as well as of genes significantly changed by pregnancy. Comparison of profiles illustrates differential gene expression patterns in these two comparisons.



Figure EB. ANOVA clustering

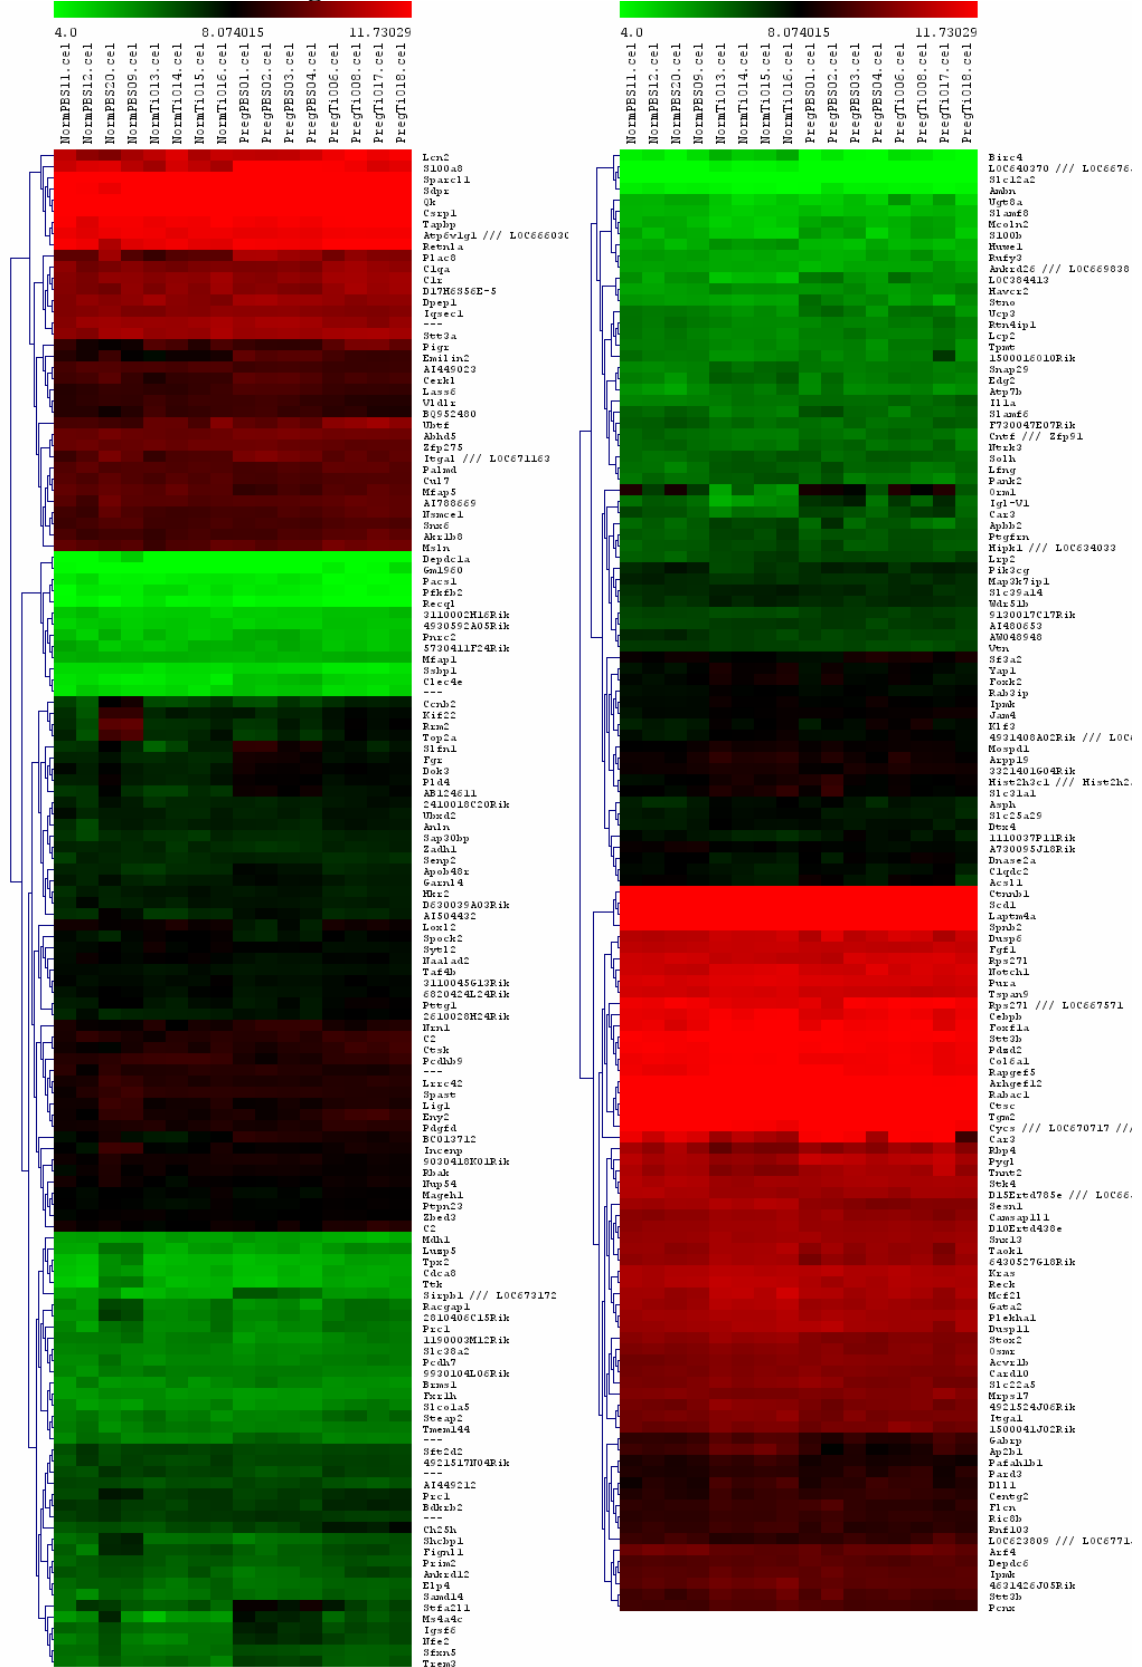

Supplement: ajrcmb_38_1_57__1.pdf [file ajrcmb_38_1_57__1.pdf]
